# Supplementary material for: Activating hexagonal boron nitride monolayers for efficient hydrogen evolution reaction by strong interfacial interactions with 2D M2X electrides
Source: Royal Society of Chemistry journal article supplement (doi:10.1039/d4se01604a), 2025-01-01
Supplement: d4se01604a1.pdf [file d4se01604a1.pdf]

## Supporting information

### **Activating Hexagonal Boron Nitride Monolayer for Efficient Hydrogen Evolution Reaction by Strong Interfacial Interactions with 2D M<sub>2</sub>X Electrides**

*Siyao Wang, Jingxiang Zhao\**

*Key Laboratory for Photonic and Electronic Bandgap Materials, Ministry of Education, School of Physics and Electronic Engineering, Harbin Normal University  
Harbin, 150025, China*

*\*To whom correspondence should be addressed. Email: zhaojingxiang@hrbnu.edu.cn*

*(J.Z.)*

**Table S1.** The computed free energy change for H\* adsorption ( $\Delta G_{H^*}$ ) on the pristine

BN and different  $M_2X$  electriles.

|                   | $\Delta G_{H^*}$ (eV) |
|-------------------|-----------------------|
| BN                | 2.44 on B site        |
| BN                | 2.49 on N site        |
| Ba <sub>2</sub> N | 2.73                  |
| Ca <sub>2</sub> N | -0.61                 |
| Hf <sub>2</sub> S | -1.26                 |
| Sc <sub>2</sub> C | -0.42                 |
| Sr <sub>2</sub> N | -0.56                 |
| Y <sub>2</sub> C  | -0.42                 |

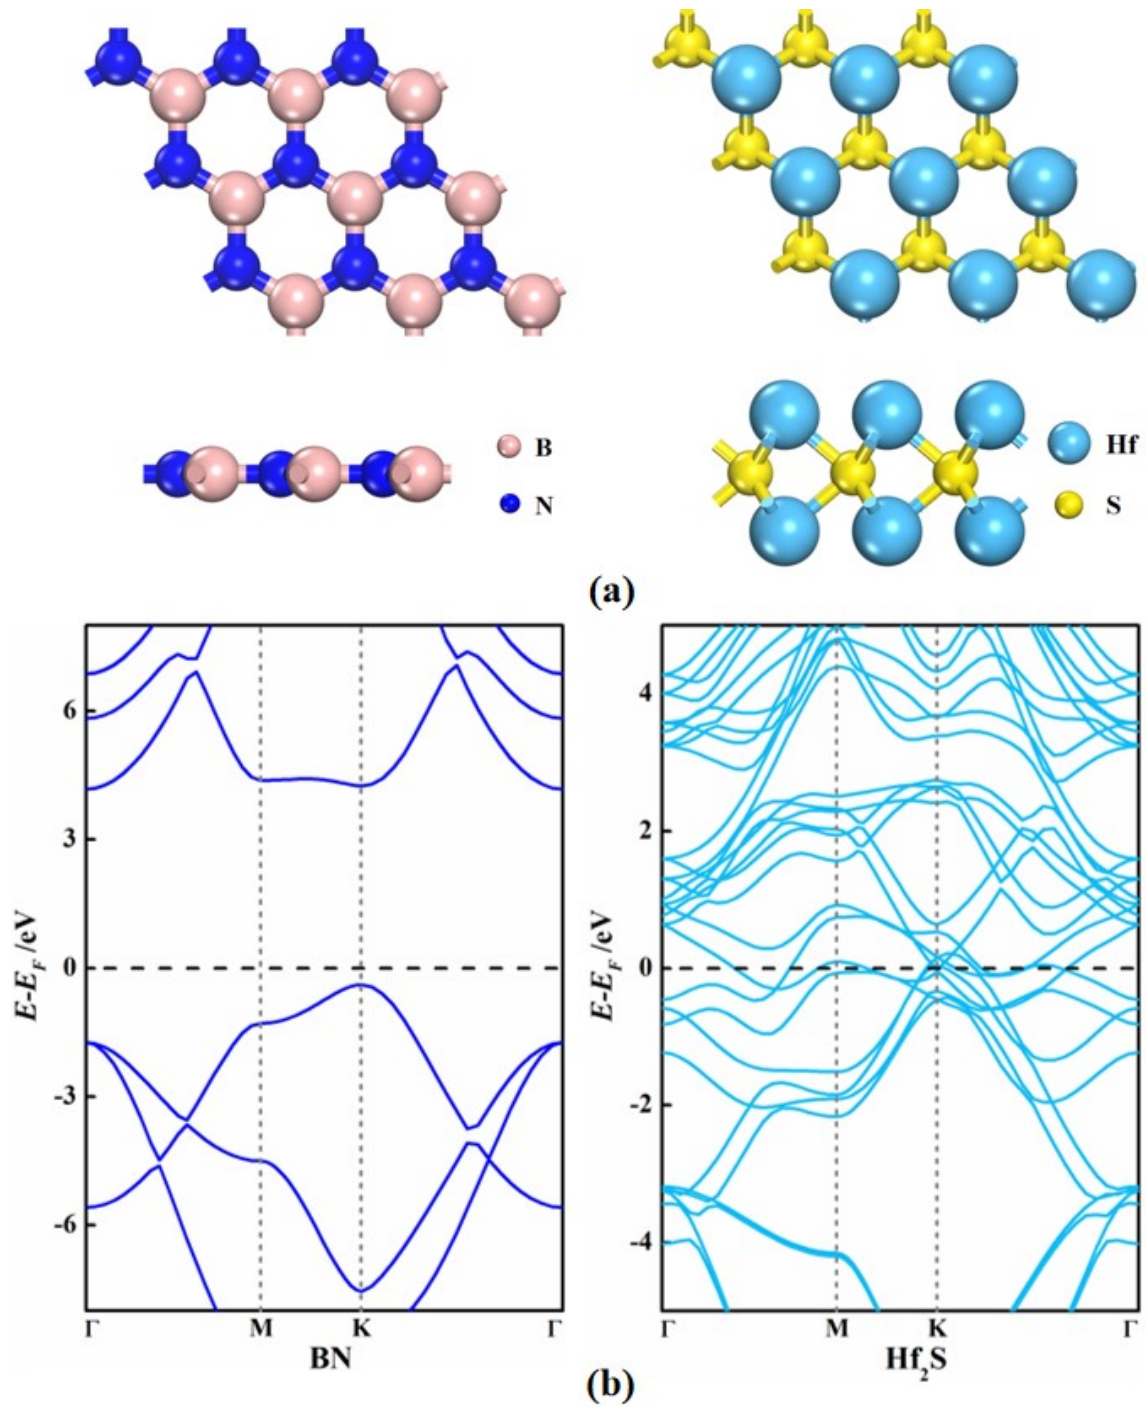

**Fig. S1.** (a) The optimized structures of the pristine BN and H<sub>2</sub>S nanosheets and (b) their corresponding band structures. The Fermi level was set as zero.

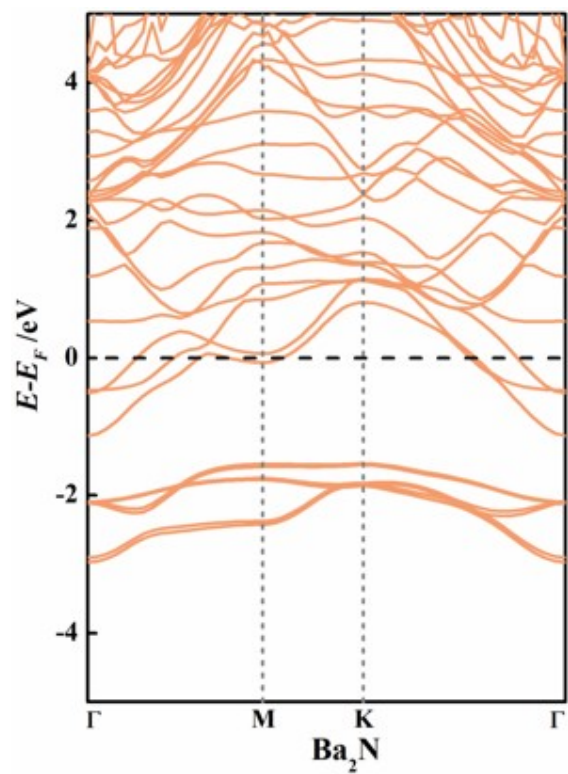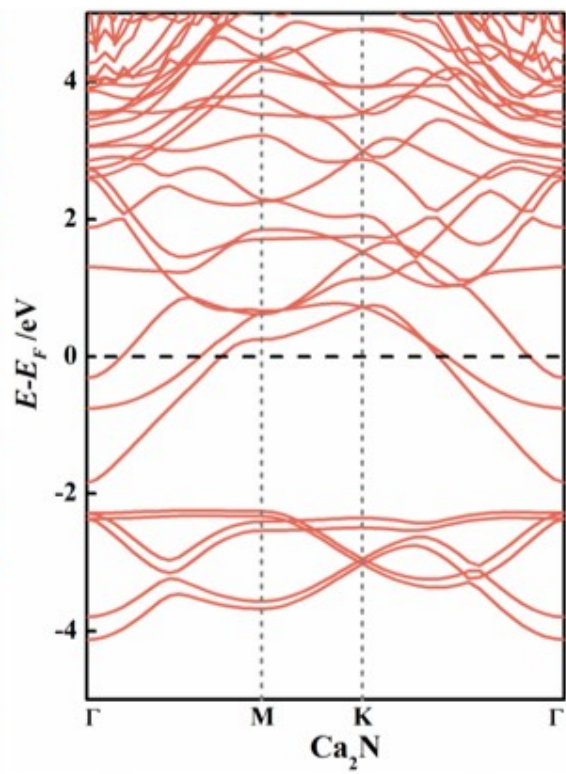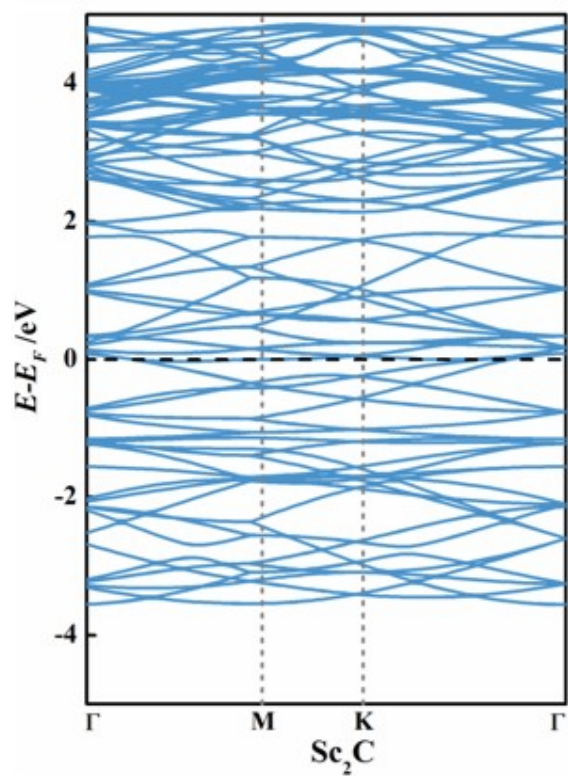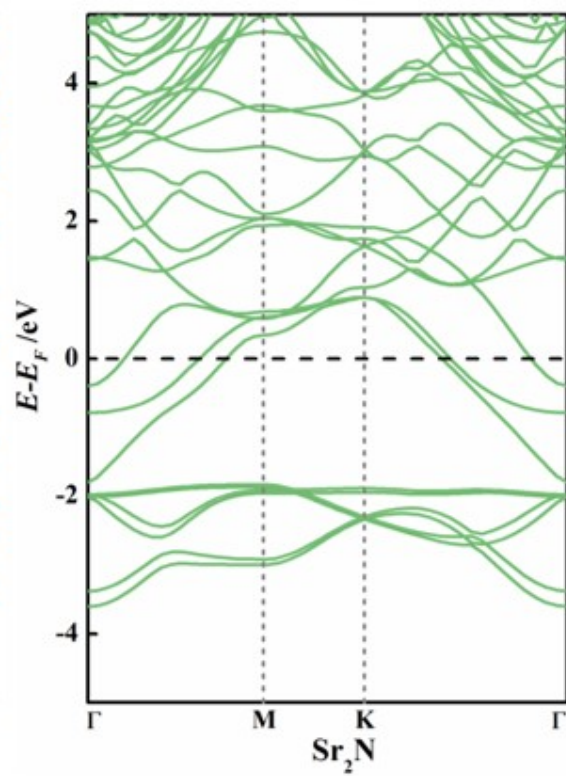

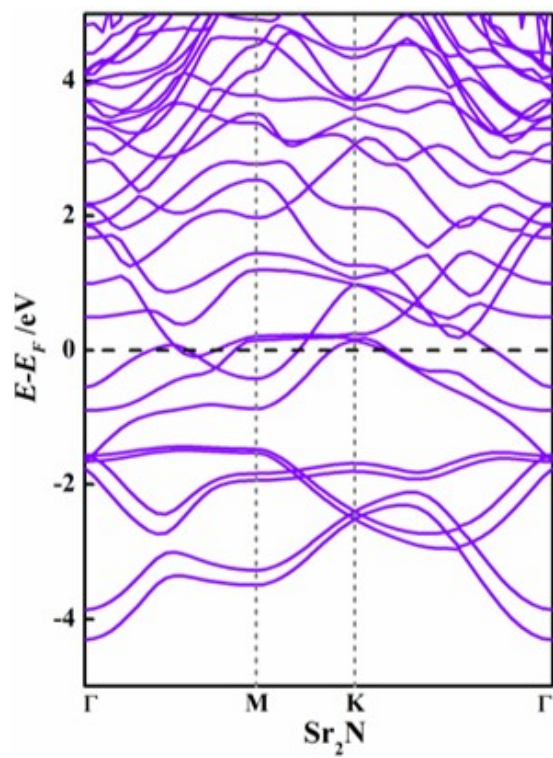

**Fig. S2.** The computed band structure of various  $\text{M}_2\text{X}$  materials.



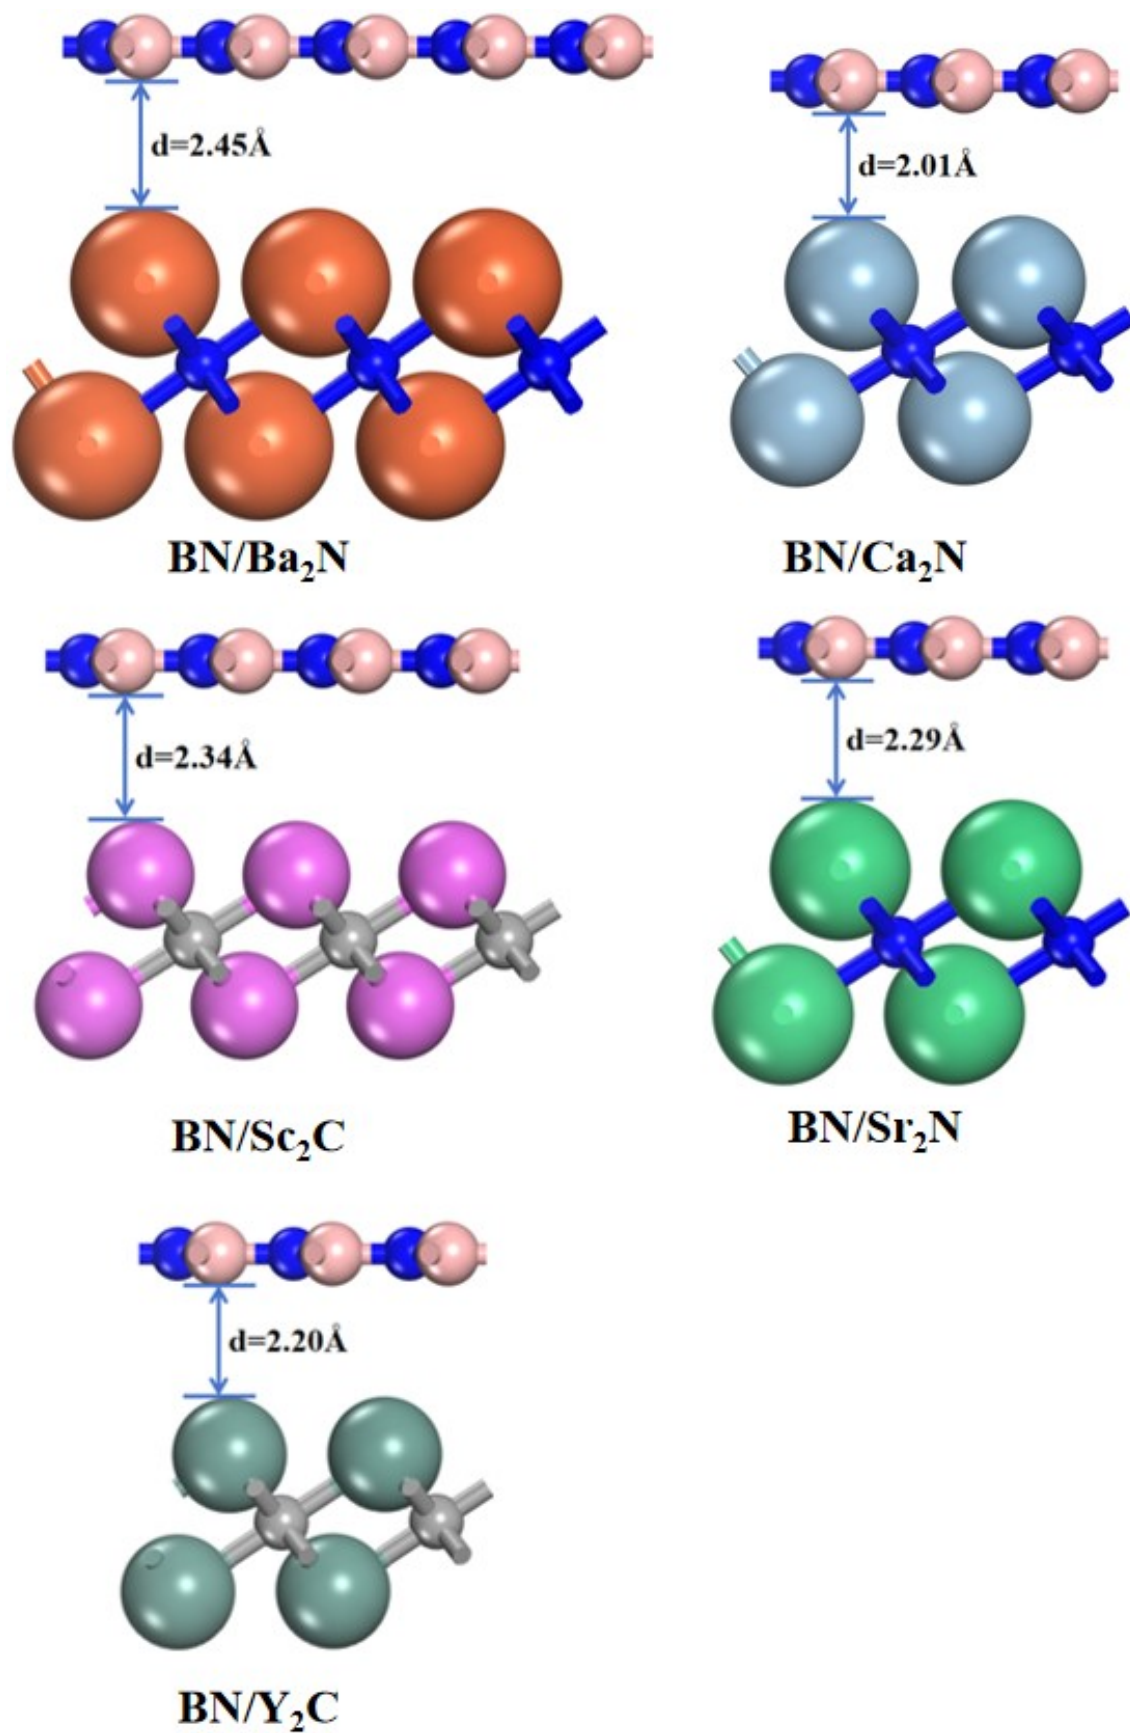

**Fig. S3.** The optimized configurations of various BN/M<sub>2</sub>X heterostructures with the corresponding interlayer distance.

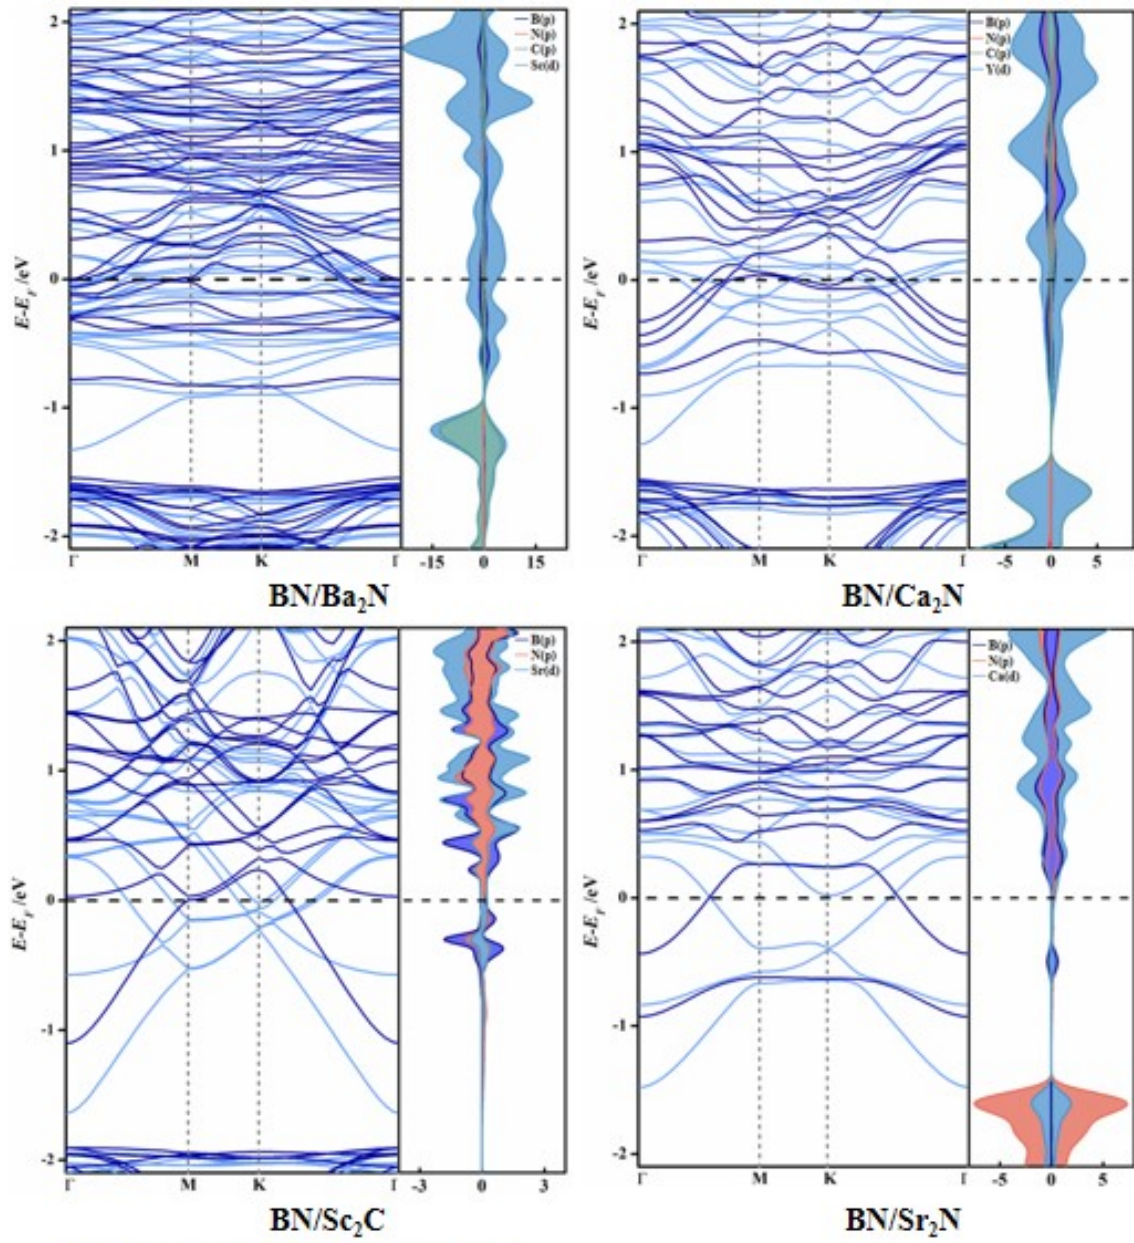

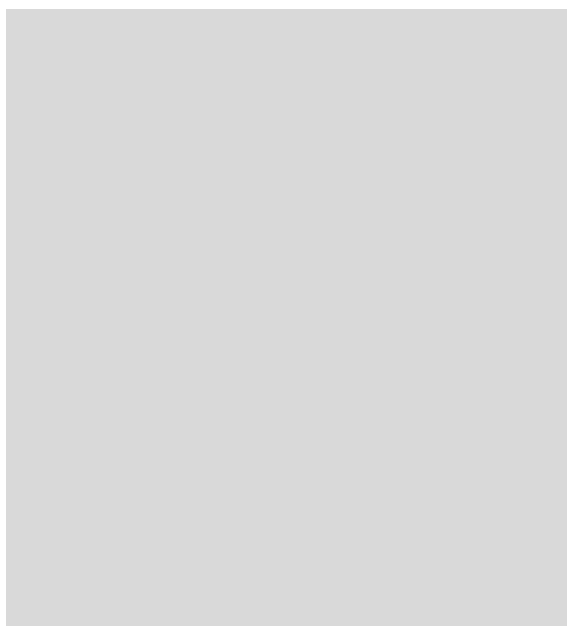

**Fig. S4.** The computed band structures and partial density of states (PDOS) of various BN/M<sub>2</sub>X heterostructures.



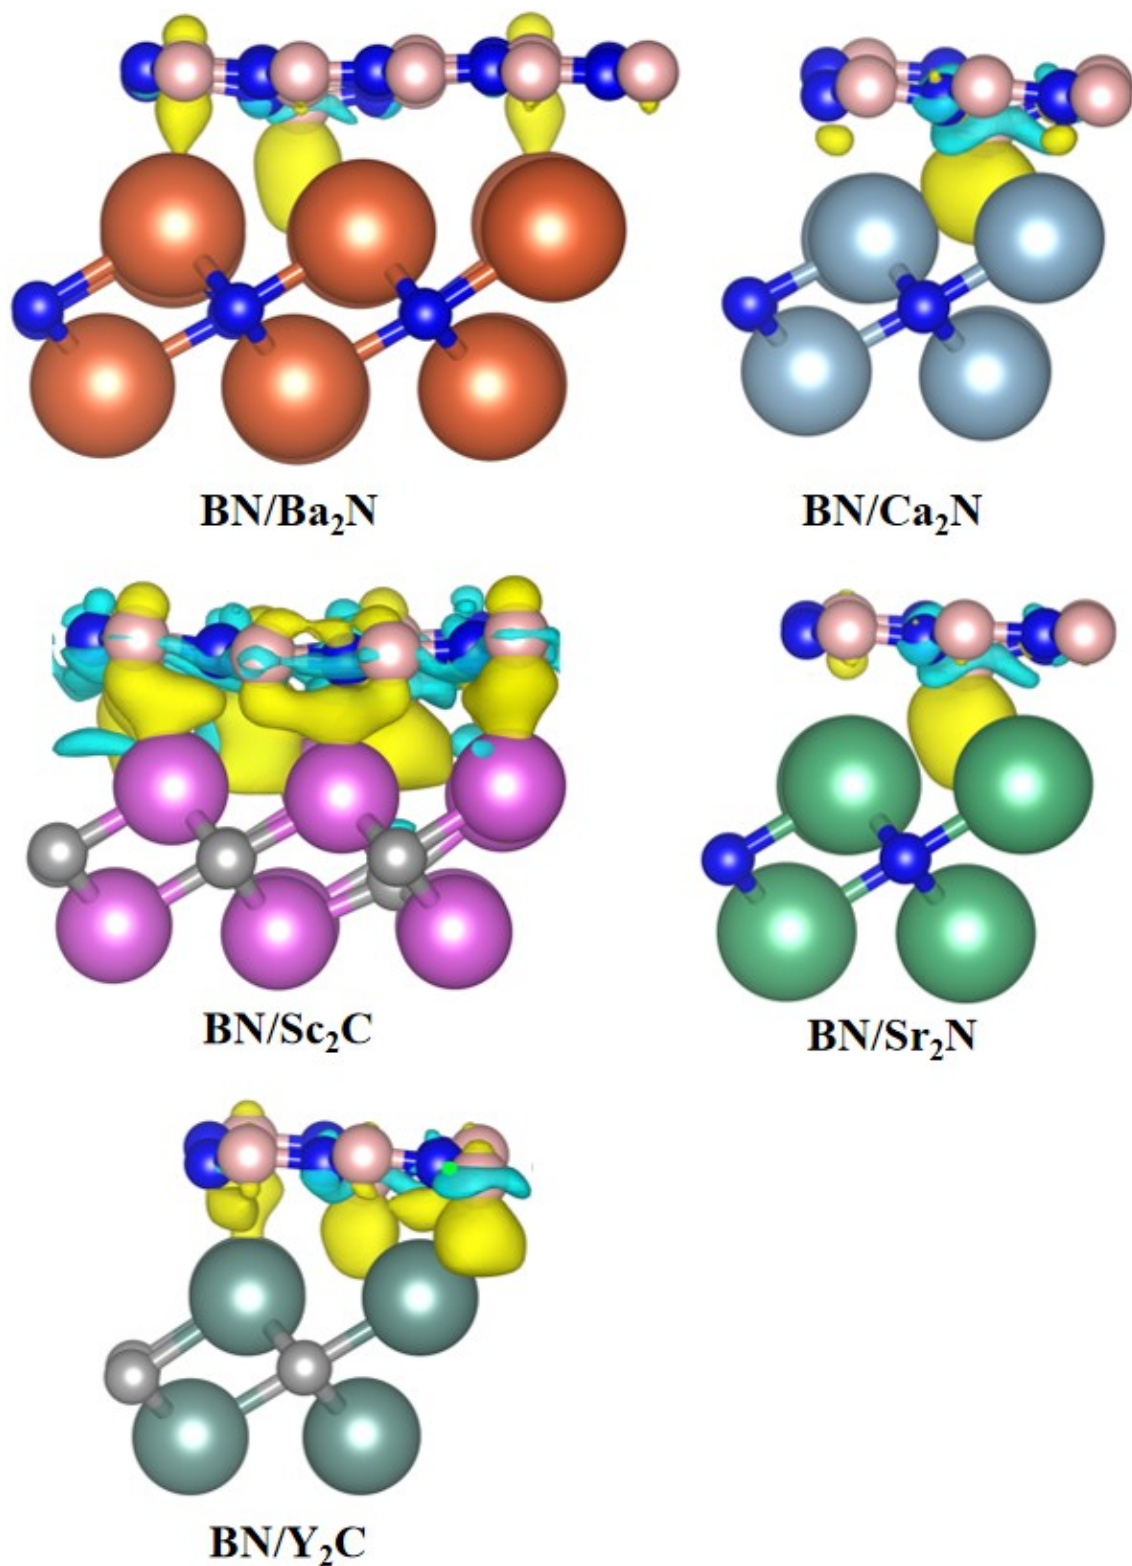

**Fig. S5.** Charge density differences of of BN/M<sub>2</sub>X materials. The isosurface value was set to 0.004 e Å<sup>-3</sup>.
